# Supplementary material for: Thermal conductivity of epitaxially grown InP: experiment and simulation
Source: Royal Society of Chemistry journal article supplement (doi:10.1039/c6ce02642g), 2017-01-01
Supplement: c6ce02642g1.pdf [file c6ce02642g1.pdf]

# Thermal Conductivity of Epitaxially-grown InP: Experiment and Simulation

Juliana Jaramillo-Fernandez<sup>a</sup>, Emigdio Chavez-Angel<sup>b</sup>, Reza Sanatinia<sup>a,†</sup>, Himanshu Kataria<sup>a,¶</sup>, Srinivasan Anand<sup>a</sup>, Sebastian Lourduoss<sup>a</sup> and Clivia M. Sotomayor-Torres<sup>a,b,c</sup>

<sup>a</sup> Department of Material and Nano Physics, Royal Institute of Technology KTH, Kista, SE-16440, Sweden; E-mail: jff@kth.se

<sup>b</sup> Catalan Institute of Nanoscience and Nanotechnology (ICN2), CSIC and The Barcelona Institute of Science and Technology, Campus UAB, Bellaterra, 08193 Barcelona, Spain.

<sup>c</sup> ICREA, Passeig Lluís Companys 23, 08010 Barcelona, Spain.

<sup>†</sup> Present address: John A. Paulson School of Engineering and Applied Sciences, Harvard University, Cambridge, Massachusetts 02138, USA.

<sup>¶</sup> Present address: IRnova AB, Electrum 236, SE-164 40 Kista, Sweden

## Electronic supplementary information (ESI)

**High resolution X-ray diffraction analysis of the InP on Si samples.** The out-of-plane misorientation of ELOG InP on Si was analyzed by performing  $\omega$ -scans and reciprocal space mapping around the (004) reflections. The full-width half maximum (FWHM) of the X-ray rocking curve indicates an average out-of-plane misorientation of 360 arcsec (Fig. S1). This result is validated by the reciprocal space mapping in Fig. S1.b).

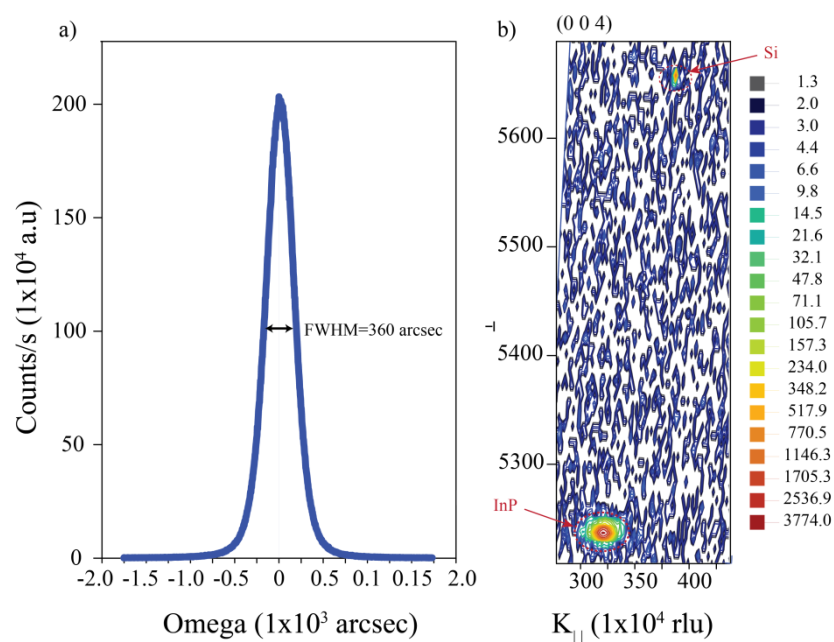

**Fig. S1.** a) HR-XRD Rocking curve ( $\omega$ -scan) of the InP (004) reflection, measured for ELOG InP grown on Si. b) High resolution reciprocal space mapping close to the (004) reflection from the ELOG InP on Si. The Bragg peaks of InP and Si are plotted with diffraction intensities represented by contour lines as a function of the perpendicular and parallel components of the reciprocal lattice vector,  $k_{\perp}$  and  $k_{\parallel}$ .

**Atomic force microscopy analysis of the surface morphology of InP on Si samples:** Atomic force microscopy measurements indicate a smooth surface with a RSM roughness from 1 to 2 nm. Fig. S2 a) is a 4x4  $\mu\text{m}$  scan of the surface of an ELOG layer grown on Si including the edge of the mesa located at the top left corner. Fig.S2b is a zoom of the region indicated by the dotted lines in Fig. S2a).

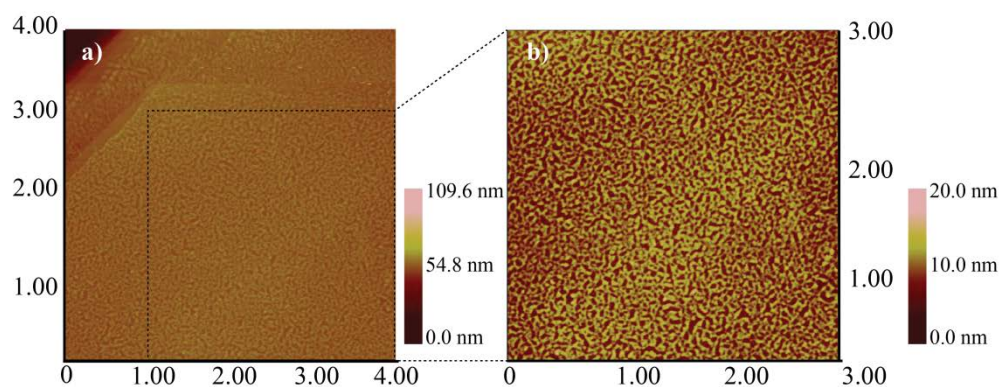

**Fig. S2.** a) AFM image of ELOG InP grown on Si including the edge of the mesa and b) 3x3  $\mu\text{m}$  zoom of the region indicated by the dotted lines. The AFM analyses revealed a smooth surface with a RSM roughness from 1 to 2 nm.
